# Supplementary material for: Introgression and repeated co‐option facilitated the recurrent emergence of C4 photosynthesis among close relatives
Source: PubMed Central journal article supplement (PMC5488178; doi:10.1111/evo.13250), 2017-04-28
Supplement: EVO-71-1541-s001.pdf [file EVO-71-1541-s001.pdf]

Supplementary Material for:

## **Introgression and repeated co-option facilitated the recurrent emergence of C<sub>4</sub> photosynthesis among close relatives**

**Authors:** Luke T. Dunning, Marjorie R. Lundgren, Jose J Moreno-Villena, Mary Namaganda, Erika J. Edwards, Patrik Nosil, Colin P. Osborne, Pascal-Antoine Christin

**This supplementary material contains supplementary methods, six figures and four tables:**

Figure S1: Comparisons of leaf anatomy in *Alloteropsis* and relatives.

Figure S2: Phylogenetic trees for genes encoding three C<sub>4</sub>-related enzymes.

Figure S3: Phylogeny of *pck-1P1* genes in Panicoideae.

Figure S4: Evolution of *ppc-1P3* genes in *Alloteropsis* and other Panicoideae.

Figure S5: Evolution of *ppdk-1P2* genes in *Alloteropsis* and other Panicoideae.

Figure S6: Evolution of *aspat-3P4* genes in *Alloteropsis* and other Panicoideae.

Table S1: *Alloteropsis semialata* accessions used in this study.

Table S2: Leaf anatomical data for the study species and accessions.

Table S3: RNA-Seq data, NCBI SRA accession numbers, and growth conditions.

Table S4: Transcript abundance (in rpkm) for each C<sub>4</sub>-related gene and sample.

Table S5: Results of positive selection analyses inferring the episodes of enzymatic adaptation in *Alloteropsis* using only fixed differences.

Table S6: Results of positive selection analyses inferring the episodes of enzymatic adaptation in the *A. angusta/A. semialata* clade using only fixed differences.

Table S7: Effect of gene tree topology on the positive selection analyses in *Alloteropsis*.

Table S8: Effect of gene tree topology on the positive selection analyses in the *A. angusta/A. semialata* clade.

## Supplementary Methods

### 1.1 Plant growth conditions

*Alloteropsis semialata*, *A. angusta*, and *Panicum pygmaeum* plants were grown from seeds or propagated vegetatively from cuttings collected in the field. All individuals were maintained in controlled environment chambers (Conviron BDR16; Manitoba, Canada) set to 60% relative humidity, 500  $\mu\text{mol m}^{-2} \text{s}^{-1}$  photosynthetic photon flux density (PPFD), and 25/20°C day/night temperatures with 14h of light at the University of Sheffield. Plants were grown in John Innes No. 2 potting compost (John Innes Manufacturers Association, Reading, England), maintained under well-watered conditions, and fertilised every two weeks (Scotts Evergreen Lawn Food; The Scotts Company, Surrey, England). After a minimum of 30 days in the above conditions, samples were taken for RNA-Seq and leaf anatomy. For RNA-Seq, certain individuals were then resampled after 30 days under a 10-hour photoperiod (Table S3). Leaf samples from *A. cimicina* were collected from two individual plants grown under ambient glasshouse conditions at Brown University.

### 1.2 RNA-Seq protocol

Total RNA was extracted from *A. semialata*, *A. angusta*, and *P. pygmaeum* samples using the RNeasy Plant Mini Kit (Qiagen, Hilden, Germany), following the manufacturer's protocol. An on-column DNA digestion step was performed using the RNase-Free Dnase Set (Qiagen, Hilden, Germany). Total RNA was eluted in RNase-free water with 20 U/ $\mu\text{L}$  of SUPERase-IN RNase Inhibitor (Life Technologies, Carlsbad, CA). RNA quality and concentration were determined using the RNA 6000 Nano kit with an Agilent Bioanalyzer 2100 (Agilent Technologies, Palo Alto, California). Extractions used for library preparation contained at least 0.5  $\mu\text{g}$  of total RNA, with an RNA integrity number (RIN) greater than 6.5. Each sample was prepared individually using the TruSeq RNA Library Preparation Kit v2 (Illumina, San Diego, CA), following the manufacturer's protocol with an eight-minute fragmentation step. Indexed libraries were paired-end sequenced by

the Sheffield Diagnostic Genetics Service on an Illumina HiSeq 2500 platform for 100 cycles in rapid mode, with 24 libraries pooled per lane of the flow cell. The two *A. cimicina* leaf samples were sequenced as described in Christin et al. (2015).

The RNA-seq data were filtered and assembled using the Agalma pipeline v.0.5.0 with default parameters (Dunn et al. 2013). In brief, this pipeline removes the reads that are low quality ( $Q < 30$ ), adaptor contaminated, or correspond to rRNA, prior to constructing *de novo* assemblies using Trinity (version trinityrnaseq\_r20140413p1; Grabherr et al. 2011). One assembly was generated per genotype, using all reads available for each accession (Table S3). All raw RNA-Seq data have been deposited in the NCBI Sequence Read Archive (project identifier SRP072730, Table S3), and transcriptome assemblies are deposited in the NCBI Transcriptome Shotgun Assembly repository (Bioproject PRJNA310121). To generate transcript abundances, the paired-end reads from each library were mapped back onto their respective reference transcriptome assembly using bowtie2 v.2.0.5 (Langmead and Salzberg 2012).

In total, 38 individually sequenced RNA-Seq libraries from 14 different accessions/species generated over 300 million 100 bp paired-end reads. This represents 66.44 Gb of data, with a mean of 1.75 Gb per library (SD = 1.56 Gb; Table S3). Over 80% of the data were kept after removing low-quality reads and ribosomal RNA sequences (Table S3). One transcriptome was assembled per genotype, pooling all the reads obtained for each genotype (mean per genotype = 3.87 Gb, SD = 1.76 Gb). The 14 assembled transcriptomes were all of comparable quality, with a mean of 44,578 trinity 'unigenes' (i.e. putative loci in the transcriptome assembly; SD = 6,905), 65,725 contigs (SD = 12,282), and a 1,543 bp N50 (SD = 167 bp).

### 1.3 Positive selection analysis

For each gene lineage, additional sequences were retrieved from complete published genomes for Panicoideae, the NCBI non-redundant nucleotide database, and other published transcriptomes (Bräutigam et al. 2014). The *pck-1P1* gene is expressed at extremely low levels in the  $C_4$  A.

*semialata* and *A. angusta* (see Results), and was therefore not assembled as part of the transcriptomes. As an alternative, we used coding sequences previously generated by Sanger sequencing when available (Christin et al. 2012), or manually assembled PCK coding regions from low coverage genome sequencing data (Olofsson et al. 2016). Each set of genes was aligned as codons using ClustalW (Thompson et al. 2002), and the resulting alignments were manually refined, including truncating the 5' or 3' ends to remove poorly aligned segments. A phylogenetic tree was inferred on 3<sup>rd</sup> positions of codons, using PhyML, with the GTR+G+I model and 100 bootstrap pseudoreplicates. The gene tree topologies were used for subsequent selection analyses, after removing sequences belonging to  $C_4$  species other than *Alloteropsis* to avoid an influence of positive selection in these taxa affecting our conclusion.  $C_3$  species outside *Alloteropsis* were however kept for positive selection analyses.

For genes not involved in the  $C_4$  cycle of *A. cimicina*, we repeated the positive selection analyses to distinguish between a single (common ancestor of *A. angusta* and *A. semialata*) and two episodes of adaptive evolution (*A. angusta* and  $C_4$  *A. semialata* separately) within the *A. angusta/A.semialata* clade. This was also performed with the hypothesis of positive selection acting only in *A. angusta*. In addition, we also performed these tests on the genes for which selection was detected on the branch leading to *A. cimicina*, after excluding *A. cimicina* sequences, to evaluate the possibility that selection operated on different sites in the different lineages.

#### 1.4 Alignment and filtering

Stringent alignment and filtering methods were used to ensure reliable alignments of each gene family for phylogenetic inference. First, sequences within each gene family were translated and aligned as proteins with four different assemblers (mafft, muscle, kalign, t-coffee) using m-coffee (Wallace et al. 2006) as part of the t-coffee package v.11.0 (Notredame et al. 2000). Consensus alignments from the four different methods were then trimmed so that only amino acids aligned in

the same position by all of the assemblers were retained. Alignments were further parsed using the tcs residue filter (Chang et al. 2014), only retaining the highest confidence residues. The trimmed protein alignments were reverse-translated into nucleotide alignments using the original sequences, and further filtered using gblocks v.0.91 (parameters: -t=c -b2=b1 -b5=h; Castresana 2000). Finally, sequences shorter than 100 bp were removed, and maximum likelihood trees were inferred with PhyML. Putative groups of Panicoideae co-orthologs were identified as monophyletic groups that contained only sequences from Panicoideae species. The alignment process was repeated for each of these groups of putative co-orthologs, starting again from the initial untrimmed sequences, producing high quality alignments for each individual group. Subsequent analyses were restricted to groups containing at least one sequence of each *Alloteropsis* species and *Sorghum* (used as the outgroup), and phylogenetic trees were again inferred with PhyML. Datasets where at least one of the six Panicoideae species (*Sorghum*, *Setaria*, *P. pygmaeum*, *A. cimicina*, *A. angusta*, and *A. semialata*), the *Alloteropsis* genus, or the *semialata/angusta* clade was not monophyletic in the maximum likelihood tree were discarded to remove genes that were duplicated after the divergence from the outgroup or poorly informative datasets. Of the 4,969 datasets originally screened, 1,042 were discarded because at least one of *Sorghum*, *Setaria*, *P. pygmaeum*, or the *Alloteropsis* genus was not monophyletic. These include potential cases of paralogy problems, sequencing or assembly errors, and poor phylogenetic resolution in the deep nodes of the trees. A further 1,130 datasets were discarded because one of the *Alloteropsis* species or the *A. semialata/A. angusta* clade was not monophyletic. This category includes potential *Alloteropsis*-specific duplicates and datasets lacking resolution among these closely-related taxa. While it cannot be excluded that some of these incongruences reflect true biological phenomena, the remaining 2,797 datasets (56% of the original ones) represent reliable markers for dating analyses. Finally, we removed species-specific duplicates, or transcript variants, by only retaining the longest sequence for each accession when several sequences from that accession formed a monophyletic clade.

## Captions for Supplementary Figures

### Figure S1: Comparisons of leaf anatomy in *Alloteropsis* and relatives.

Leaf cross-sections are shown for each group. The red bar at the bottom represents 0.5 mm. Black arrows indicate mesophyll cells (M), red arrows inner sheath (IS) cells and orange arrows outer sheath (OS) cells. The species and photosynthetic type are indicated on the right.

### Figure S2: Phylogenetic trees for genes encoding three C<sub>4</sub>-related enzymes.

These maximum likelihood trees show the relationships among genes used to circumscribe grass co-orthologs for the phylogenetic annotation of contigs. The trees are shown for three families changed compared to Christin et al. (2013, 2015); **A**) NAD-malate dehydrogenase (*nadmdh-4*), **B**) phosphoenolpyruvate-phosphate translocator (*ppt*)/triosephosphate-phosphate translocator (*tpt*)/glucose-6-phosphate/phosphate translocator (*gpt*), **C**) Sodium bile acid symporter (*sbas*). For each tree, grass co-orthologs are delimited on the right, with names following the approach of Christin et al. (2015). Bootstrap values are indicated near branches

### Figure S3: Phylogeny of *pck-1P1* genes in Panicoideae.

This phylogenetic tree was inferred on 3<sup>rd</sup> positions of codons. Bootstrap values are indicated near branches. Branches leading to genes that have been co-opted for C<sub>4</sub> photosynthesis are in green, following Christin et al. (2012). Tribes are delimited on the right. The laterally acquired *pck-1P1-C* gene is indicated.

### Figure S4: Evolution of *ppc-1P3* genes in *Alloteropsis* and other Panicoideae.

This phylogenetic tree was inferred on 3<sup>rd</sup> positions of codons of *ppc-1P3* genes of Panicoideae. Bootstrap values are indicated near branches. Names of C<sub>4</sub> accessions are in bold. Gray branches were pruned before selection tests. Positive selection was detected on the thick branch. Groups of *Alloteropsis* genes are delimited on the right.

**Figure S5: Evolution of *ppdk-1P2* genes in *Alloteropsis* and other Panicoideae.**

This phylogenetic tree was inferred on 3<sup>rd</sup> positions of codons of *ppdk-1P2* genes of Panicoideae. Bootstrap values are indicated near branches. Names of C<sub>4</sub> accessions are in bold. Gray branches were pruned before selection tests. Positive selection was detected on the thick branch. Amino acid positions with a posterior probability >0.90 of being under positive selection are indicated on the right, asterisks indicate positions with a posterior probability >0.95, with those associated with C<sub>4</sub> accessions in gray. Positions are indicated on the top, based on *Sorghum* gene Sb09g019930.1.

**Figure S6: Evolution of *aspat-3P4* genes in *Alloteropsis* and other Panicoideae.**

This phylogenetic tree was inferred on 3<sup>rd</sup> positions of codons of *aspat-3P4* genes of Panicoideae. Bootstrap values are indicated near branches. Names of C<sub>4</sub> accessions are in bold. Gray branches were pruned before selection tests. Positive selection was detected on thick branches. Amino acid positions with a posterior probability >0.90 of being under positive selection are indicated on the right, asterisks indicate positions with a posterior probability >0.95, with those associated with C<sub>4</sub> accessions in gray. Positions are indicated on the top, based on *Sorghum* gene Sb03g035220.1. Asterisks indicate positions with a posterior probability >0.9.

**Table S1: *Alloteropsis semialata* accessions used in this study<sup>1</sup>.**

| <b>ID</b> | <b>Sample name</b> | <b>Country</b> | <b>Latitude</b> | <b>Longitude</b> | <b>Type</b>                    | <b><math>\delta^{13}\text{C}</math></b> |
|-----------|--------------------|----------------|-----------------|------------------|--------------------------------|-----------------------------------------|
| RSA5      | KWT3               | South Africa   | -32.70          | 27.53            | C <sub>3</sub>                 | -26.3                                   |
| TAN2      | L01                | Tanzania       | -5.63           | 32.69            | C <sub>3</sub> +C <sub>4</sub> | -26.3                                   |
| TAN1      | L04                | Tanzania       | -8.51           | 35.17            | C <sub>3</sub> +C <sub>4</sub> | -23.1                                   |
| TAN4      | L02                | Tanzania       | -9.04           | 32.48            | C <sub>4</sub>                 | -11.4                                   |
| BUR1      | BF3                | Burkina Faso   | 10.85           | -4.83            | C <sub>4</sub>                 | -11.3                                   |
| MAD1      | Maj                | Madagascar     | -15.67          | 46.37            | C <sub>4</sub>                 | -11.8                                   |
| RSA3      | MDB8               | South Africa   | -25.76          | 29.47            | C <sub>4</sub>                 | -12.7                                   |
| RSA4      | SFD3               | South Africa   | -28.39          | 29.04            | C <sub>4</sub>                 | -12.7                                   |
| AUS1      | Aus2               | Australia      | -19.62          | 146.96           | C <sub>4</sub>                 | -12.1                                   |
| TPE1      | TW10               | Taiwan         | 24.47           | 120.72           | C <sub>4</sub> <sup>2</sup>    | -11.8                                   |

<sup>1</sup> Collection localities and photosynthetic type with the diagnostic physiology data come from Lundgren et al. (2016). Stable isotope data from Lundgren et al. (2015). <sup>2</sup>Inferred from stable isotope data, adjusted for anthropogenic CO<sub>2</sub> sources per Lundgren et al. (2016).



**Table S2: Leaf anatomical data for the study species and accessions<sup>1</sup>.**

| Species/Accession                           | Pathway                        | C <sub>4</sub> sheath | minor veins <sup>2</sup> | IVD (µm) | nb.M | OS.width (µm) | IS.width (µm) | OS:IS |
|---------------------------------------------|--------------------------------|-----------------------|--------------------------|----------|------|---------------|---------------|-------|
| <i>Entolasia marginata</i> <sup>3</sup>     | C <sub>3</sub>                 | na                    | absent                   | 255.5    | 7.5  | 24.9          | 4.7           | 5.3   |
| <i>Panicum pygmaeum</i> <sup>3</sup>        | C <sub>3</sub>                 | na                    | absent                   | 219.9    | 7.0  | 27.9          | 6.2           | 4.5   |
| <i>Alloteropsis semialata</i> , RSA5        | C <sub>3</sub>                 | na                    | absent                   | 186.2    | 7.4  | 12.2          | 6.8           | 1.8   |
| <i>Alloteropsis semialata</i> , TAN2        | C <sub>3</sub> +C <sub>4</sub> | inner                 | absent                   | 167.4    | 4.4  | 12.4          | 10.1          | 1.2   |
| <i>Alloteropsis semialata</i> , TAN1        | C <sub>3</sub> +C <sub>4</sub> | inner                 | absent                   | 159.8    | 5.4  | 11.8          | 9.4           | 1.3   |
| <i>Alloteropsis semialata</i> , TAN4        | C <sub>4</sub>                 | inner                 | present                  | 127.8    | 2.7  | 9.7           | 14.0          | 0.7   |
| <i>Alloteropsis semialata</i> , AUS1        | C <sub>4</sub>                 | inner                 | present                  | 79.1     | 1.8  | 10.4          | 12.0          | 0.9   |
| <i>Alloteropsis semialata</i> , BUR1        | C <sub>4</sub>                 | inner                 | present                  | 77.9     | 1.3  | 11.3          | 10.6          | 1.1   |
| <i>Alloteropsis semialata</i> , MAD1        | C <sub>4</sub>                 | inner                 | present                  | 92.9     | 1.8  | 9.7           | 13.3          | 0.7   |
| <i>Alloteropsis semialata</i> , RSA3        | C <sub>4</sub>                 | inner                 | present                  | 86.0     | 1.8  | 9.6           | 11.7          | 0.8   |
| <i>Alloteropsis semialata</i> , RSA4        | C <sub>4</sub>                 | inner                 | present                  | 97.2     | 1.8  | 8.4           | 13.3          | 0.6   |
| <i>Alloteropsis semialata</i> , TPE1        | C <sub>4</sub>                 | inner                 | present                  | 84.5     | 1.2  | 8.7           | 7.2           | 1.2   |
| <i>Alloteropsis angusta</i>                 | C <sub>4</sub>                 | inner                 | present                  | 83.4     | 1.0  | 9.5           | 9.8           | 1     |
| <i>Alloteropsis cimicina</i> <sup>3</sup>   | C <sub>4</sub>                 | outer                 | absent                   | 292.3    | 3.4  | 46.7          | 6.0           | 7.8   |
| <i>Alloteropsis paniculata</i> <sup>3</sup> | C <sub>4</sub>                 | outer                 | absent                   | 198.0    | 2.7  | 43.9          | 5.6           | 7.8   |

<sup>1</sup> Column headings and abbreviations: C<sub>4</sub> sheath, bundle sheath used for CO<sub>2</sub> reduction; IVD, interveinal distance; nb.M, number of mediolateral mesophyll cells separating vein units; OS.width, the width of the outer bundle sheath cells; IS.width, the width of the inner bundle sheath cells; OS:IS is the ratio of outer to inner bundle sheath cell size. <sup>2</sup> Minor veins are considered 4<sup>th</sup> and 5<sup>th</sup> order veins here, while the midrib, secondary and tertiary vein orders are excluded from this category. <sup>3</sup> Data taken from Christin et al. 2013.

**Table S3: RNA-Seq data, NCBI SRA accession numbers, and growth conditions.**

| Genotype | Species             | SRA accession | Tissue | Photoperiod | Raw PE Reads | Clean PE Reads | No. Trinity contigs |
|----------|---------------------|---------------|--------|-------------|--------------|----------------|---------------------|
| ACIM     | <i>A. cimicina</i>  | SRR3994072    | Leaf   | Glasshouse  | 36087907     | 27351333       | 51195               |
|          |                     | SRR3994073    | Leaf   | Glasshouse  | 28714973     | 4854902        |                     |
| ANG33    | <i>A. angusta</i>   | SRR3994075    | Leaf   | 14hr        | 7334658      | 6612013        | 72468               |
| ANG48    | <i>A. angusta</i>   | SRR3994077    | Leaf   | 14hr        | 7498597      | 6826154        | 71835               |
| AUS1     | <i>A. semialata</i> | SRR3321311    | Leaf   | 10hr        | 5308967      | 4675722        | 54197               |
|          |                     | SRR3322358    | Leaf   | 14hr        | 11184717     | 9624467        |                     |
|          |                     | SRR3322714    | Root   | 14hr        | 3950267      | 3613034        |                     |
| BUR1     | <i>A. semialata</i> | SRR3322990    | Leaf   | 10hr        | 11153698     | 9575675        | 75444               |
|          |                     | SRR3322973    | Leaf   | 14hr        | 16859344     | 14948845       |                     |
|          |                     | SRR3323003    | Root   | 14hr        | 2223260      | 3042111        |                     |
| RSA5     | <i>A. semialata</i> | SRR3323066    | Leaf   | 10hr        | 5500526      | 2402701        | 63273               |
|          |                     | SRR3323049    | Leaf   | 14hr        | 13458893     | 12135442       |                     |
|          |                     | SRR3323067    | Root   | 14hr        | 3107385      | 2915544        |                     |
| TAN2     | <i>A. semialata</i> | SRR3323068    | Leaf   | 10hr        | 17997033     | 16131010       | 74639               |
|          |                     | SRR3323088    | Leaf   | 14hr        | 5423680      | 4804035        |                     |
|          |                     | SRR3323114    | Root   | 14hr        | 4282037      | 4018356        |                     |
| TAN4     | <i>A. semialata</i> | SRR3323124    | Leaf   | 14hr        | 3218981      | 3218981        | 58125               |
|          |                     | SRR3323125    | Root   | 14hr        | 4689624      | 4689624        |                     |
| TAN1     | <i>A. semialata</i> | SRR3323127    | Leaf   | 10hr        | 25015574     | 22153077       | 74400               |
|          |                     | SRR3323128    | Root   | 10hr        | 11154350     | 9983220        |                     |
|          |                     | SRR3323129    | Root   | 14hr        | 3137368      | 2928130        |                     |
| MAD1     | <i>A. semialata</i> | SRR3323131    | Leaf   | 10hr        | 1338699      | 1146407        | 75444               |
|          |                     | SRR3323132    | Leaf   | 14hr        | 2546427      | 2190484        |                     |
|          |                     | SRR3323133    | Root   | 14hr        | 10980770     | 9826198        |                     |
|          |                     | SRR3323134    | Root   | 10hr        | 3460229      | 3201082        |                     |
| RSA3     | <i>A. semialata</i> | SRR3323186    | Leaf   | 10hr        | 5001282      | 2021239        | 74023               |
|          |                     | SRR3323137    | Leaf   | 14hr        | 11922494     | 10671710       |                     |
|          |                     | SRR3323187    | Root   | 14hr        | 3950750      | 4185063        |                     |
| PPYG     | <i>P. pygmaeum</i>  | SRR3330791    | Leaf   | 14hr        | 4093890      | 3793221        | 72117               |
|          |                     | SRR3323220    | Leaf   | 14hr        | 8925603      | 8087404        |                     |
|          |                     | SRR3330803    | Root   | 14hr        | 4106624      | 3482683        |                     |
|          |                     | SRR3330803    | Root   | 14hr        | 2026469      | 1752009        |                     |
| RSA4     | <i>A. semialata</i> | SRR3323240    | Leaf   | 10hr        | 4467544      | 3470414        | 87362               |
|          |                     | SRR3323220    | Leaf   | 14hr        | 16357704     | 14849292       |                     |
|          |                     | SRR3323241    | Root   | 14hr        | 3248828      | 4614268        |                     |
| TPE1     | <i>A. semialata</i> | SRR3323242    | Leaf   | 10hr        | 12422286     | 6546514        | 57350               |
|          |                     | SRR3323243    | Leaf   | 14hr        | 7457117      | 10995742       |                     |
|          |                     | SRR3323244    | Root   | 14hr        | 2604885      | 3699333        |                     |

**Table S5: Results of positive selection analyses inferring the episodes of enzymatic adaptation in *Alloteropsis*<sup>1</sup> using only codons with fixed nucleotides for each photosynthetic type within *A. semialata* and *A. angusta*.**

| Gene              | Number of sequences | Number codons removed | Site model M1a | One origin |      | Two origins |      | Three origins |      | Only <i>A. camicina</i> |              |
|-------------------|---------------------|-----------------------|----------------|------------|------|-------------|------|---------------|------|-------------------------|--------------|
|                   |                     |                       |                | BSA        | BSA1 | BSA         | BSA1 | BSA           | BSA1 | BSA                     | BSA1         |
| <i>aspat-2P3</i>  | 7                   | 23                    | <b>0.00*</b>   | 4.05       | 4.05 | 4.05        | 4.05 | 3.54          | 3.54 | 4.05                    | 4.05         |
| <i>nadpme-1P4</i> | 8                   | 29                    | 25.14          | 6.13       | 4.43 | 6.13        | 4.43 | 11.68         | 9.83 | 3.77                    | <b>0.00*</b> |
| <i>ppdk-1P2</i>   | 8                   | 48                    | 26.34          | 11.49      | 8.91 | 11.49       | 8.91 | 9.67          | 4.73 | 4.27                    | <b>0.00*</b> |
| <i>alaat-1P5</i>  | 7                   | 33                    | <b>0.00*</b>   | 4.03       | 4.03 | 4.04        | 4.04 | 3.61          | 3.61 | 4.04                    | 4.04         |

<sup>1</sup> The  $\Delta$ AICc values compared to the best fit model for that gene are shown. The most appropriate model is indicated with an asterisk, with the null model (M1a) only rejected if the  $\Delta$ AICc was at least 5.22 (equivalent to a p-value of 0.01 with a likelihood ratio test with df = 2). Two branch-site models were used to test for a relaxation of purifying selection (BSA), and potential positive selection (BSA1).

**Table S6: Results of positive selection analyses inferring the episodes of enzymatic adaptation in the *A. angusta*/*A. semialata* clade<sup>1</sup> using only codons with fixed nucleotides for each photosynthetic type within *A. semialata* and *A. angusta*.**

| Gene              | Number of sequences | Number codons removed | Site model M1a | One origin |       | Two origins  |              | Only <i>A. angusta</i> |              |
|-------------------|---------------------|-----------------------|----------------|------------|-------|--------------|--------------|------------------------|--------------|
|                   |                     |                       |                | BSA        | BSA1  | BSA          | BSA1         | BSA                    | BSA1         |
| <i>aspat-3P4</i>  | 7                   | 13                    | 8.62           | 12.67      | 12.67 | <b>0.00*</b> | <b>0.00*</b> | <b>0.00*</b>           | <b>0.00*</b> |
| <i>nadpme-1P4</i> | 7                   | 29                    | <b>0.00*</b>   | 4.04       | 4.04  | 3.47         | 1.19         | 3.71                   | 3.71         |
| <i>ppc-1P3</i>    | 6                   | 70                    | 65.71          | 23.63      | 22.33 | 9.50         | 5.83         | 6.17                   | <b>0.00*</b> |
| <i>ppdk-1P2</i>   | 7                   | 48                    | <b>0.00*</b>   | 4.02       | 4.02  | 3.38         | 3.38         | 3.20                   | 3.20         |

<sup>1</sup> The  $\Delta$ AICc values compared to the best fit model for that gene are shown. The most appropriate model is indicated with an asterisk, with the null model (M1a) only rejected if the  $\Delta$ AICc 5.22 (equivalent to a p-value of 0.01 with a likelihood ratio test with df = 2). Two branch-site models were used to test for a relaxation of purifying selection (BSA), and potential positive selection (BSA1).

**Table S7: Effect of gene tree topology on the conclusions of the positive selection analyses in *Alloteropsis*<sup>1</sup>.**

| Gene              | Site model<br>M1a | One origin |      | Two origins |      | Three origins |      | Only <i>A. cimicina</i> |            |
|-------------------|-------------------|------------|------|-------------|------|---------------|------|-------------------------|------------|
|                   |                   | BSA        | BSA1 | BSA         | BSA1 | BSA           | BSA1 | BSA                     | BSA1       |
| <i>aspat-2P3</i>  | <b>100</b>        | 0          | 0    | 0           | 0    | 0             | 0    | 0                       | 0          |
| <i>nadpme-1P4</i> | 0                 | 0          | 0    | 0           | 0    | 0             | 0    | 0                       | <b>100</b> |
| <i>ppdk-1P2</i>   | 0                 | 0          | 0    | 0           | 0    | 0             | 0    | 0                       | <b>100</b> |
| <i>alaat-1P5</i>  | <b>100</b>        | 0          | 0    | 0           | 0    | 0             | 0    | 0                       | 0          |

<sup>1</sup> The number of topologies favouring each modelled, out of 100 bootstrap pseudoreplicates, is indicated.

**Table S8: Assessing the effect of gene tree topology on the conclusions of the positive selection analyses within *A. semialata* and *A. angusta*<sup>1</sup>.**

| Gene              | Site model<br>M1a | One origin |      | Two origins |            | Only <i>A. cimicina</i> |            |
|-------------------|-------------------|------------|------|-------------|------------|-------------------------|------------|
|                   |                   | BSA        | BSA1 | BSA         | BSA1       | BSA                     | BSA1       |
| <i>aspat-3P4</i>  | 0                 | 0          | 0    | 0           | <b>100</b> | 0                       | 0          |
| <i>nadpme-1P4</i> | 2                 | 0          | 0    | 0           | <b>98</b>  | 0                       | 0          |
| <i>ppc-1P3</i>    | 0                 | 0          | 0    | 0           | 0          | 0                       | <b>100</b> |
| <i>ppdk-1P2</i>   | <b>100</b>        | 0          | 0    | 0           | 0          | 0                       | 0          |

<sup>1</sup> The number of topologies favouring each modelled, out of 100 bootstrap pseudoreplicates, is indicated.

### Supplementary references:

- Bräutigam, A., S. Schliesky, C. Külahoglu, C. P. Osborne, and A. P. Weber. 2014. Towards an integrative model of C<sub>4</sub> photosynthetic subtypes: insights from comparative transcriptome analysis of NAD-ME, NADP-ME, and PEP-CK C<sub>4</sub> species. *J Exp Bot* **65**:3579-3593.
- Castresana, J. 2000. Selection of conserved blocks from multiple alignments for their use in phylogenetic analysis. *Mol Biol Evol* **17**:540–552.
- Chang, J.M., Di Tommaso, P., Notredame, C. 2014. TCS: A new multiple sequence alignment reliability measure to estimate alignment accuracy and improve phylogenetic tree reconstruction. *Mol Biol Evol* **31**:1625-1637.
- Christin, P. A., E. J. Edwards, G. Besnard, S. F. Boxall, R. Gregory, E. A. Kellogg, J. Hartwell, and C. P. Osborne. 2012. Adaptive evolution of C<sub>4</sub> photosynthesis through recurrent lateral gene transfer. *Curr Biol* **22**:445-449.
- Christin, P. A., S. F. Boxall, R. Gregory, E. J. Edwards, J. Hartwell, and C. P. Osborne. 2013. Parallel recruitment of multiple genes into C<sub>4</sub> photosynthesis. *Genome Biol Evol* **5**:2174-2187.
- Christin, P. A., M. Arakaki, C. P. Osborne, and E. J. Edwards. 2015. Genetic enablers underlying the clustered evolutionary origins of C<sub>4</sub> photosynthesis in angiosperms. *Mol Biol Evol* **32**:846-858.
- Dunn, C. W., M. Howison, and F. Zapata. 2013. Agalma: an automated phylogenomics workflow. *BMC Bioinformatics* **14**:330.
- Grabherr, M. G., B. J. Haas, M. Yassour, J. Z. Levin, D. A. Thompson, I. Amit, X. Adiconis, L. Fan, R. Raychowdhury, Q. Zeng et al. 2011. Full-length transcriptome assembly from RNA-seq data without a reference genome. *Nature Biotechnol* **29**:644-652.
- Langmead, B., and S. Salzberg. 2012. Fast gapped-read alignment with Bowtie 2. *Nat Methods* **9**:357-359.
- Lundgren, M. R., G. Besnard, B. S. Ripley, C. E. R. Lehmann, D. S. Chatelet, R. G. Kynast, M. Namaganda, M. S. Vorontsova, R. C. Hall, J. Elia, et al. 2015. Photosynthetic innovation broadens the niche within a single species. *Ecol Lett* **18**:1021-1029.
- Lundgren, M. R., P. A. Christin, E. Gonzalez Escobar, B. S. Ripley, G. Besnard, C. M. Long, P. W. Hattersley, R. P. Ellis, R. C. Leegood, and C. P. Osborne CP. 2016. Evolutionary implications of C<sub>3</sub>-C<sub>4</sub> intermediates in the grass *Alloteropsis semialata*. *Plant Cell Environ* **39**:1874-85
- Notredame, C., Higgins, D.G., Heringa, J. 2000. T-Coffee: A novel method for fast and accurate multiple sequence alignment. *J Mol Biol* **302**:205–17.
- Olofsson, J. K., M. Bianconi, G. Besnard, L. T. Dunning, M. R. Lundgren, H. Holota, M. S. Vorontsova, O. Hidalgo, I. J. Leitch, P. Nosil, C. P. Osborne, and P. A. Christin. 2016. y reveals the intraspecific spread of adaptive mutations for a complex traitptive mutations for a

complex trait. *Mol Ecol* **24**: 6107-6123

Thompson, J. D., D. G. Higgins, and T. J. Gibson. 1994. CLUSTAL W: improving the sensitivity of progressive multiple sequence alignment through sequence weighting, position-specific gap penalties and weight matrix choice. *Nucleic Acids Res* **22**:4673-4680.

Wallace, I.M., O'Sullivan, O., Higgins, D.G., Notredame, C. 2006. M-Coffee: combining multiple sequence alignment methods with T-Coffee. *Nucleic Acids Res* **34**:1692–9.



Fig. S1

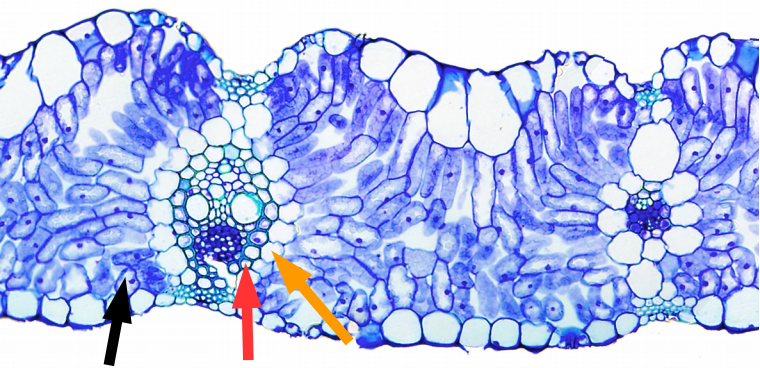

*A. semialata*, C<sub>3</sub>

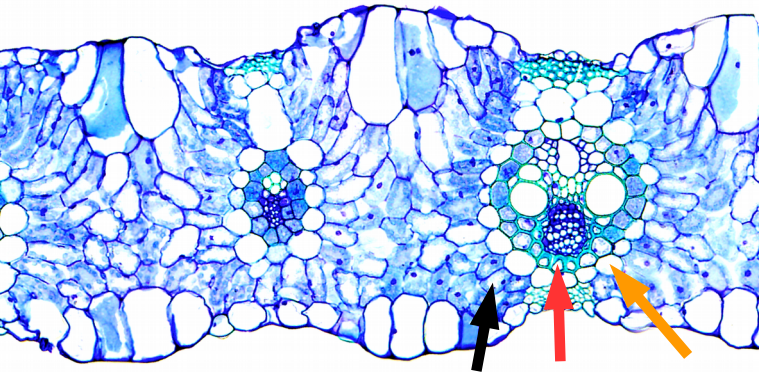

*A. semialata*, C<sub>3</sub>+C<sub>4</sub>

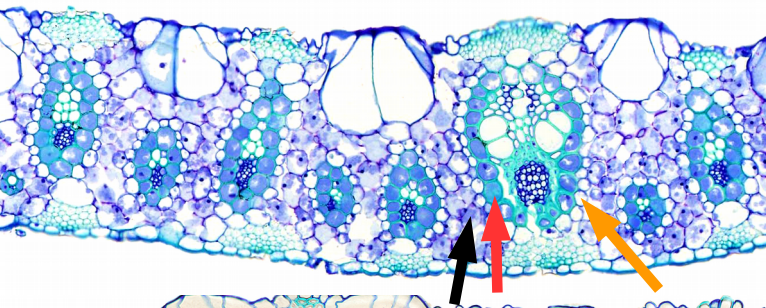

*A. semialata*, C<sub>4</sub>

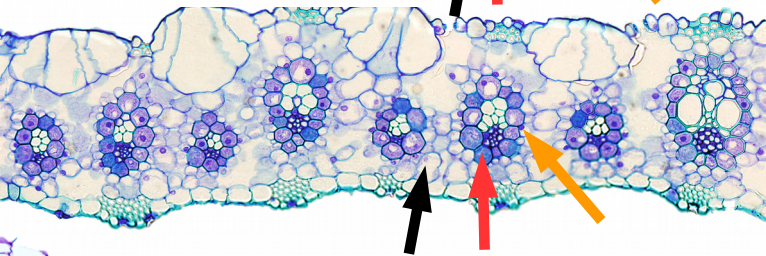

*A. angusta*, C<sub>4</sub>

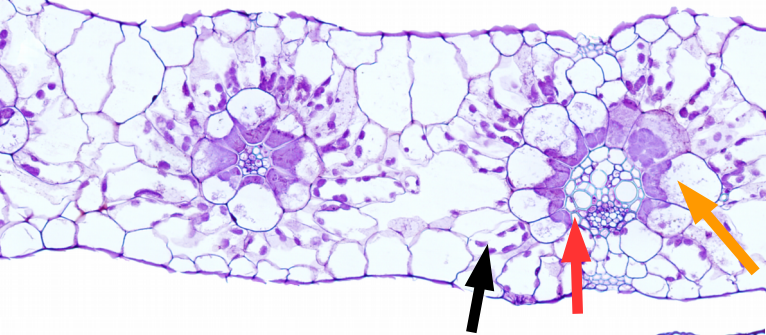

*A. cimicina*, C<sub>4</sub>

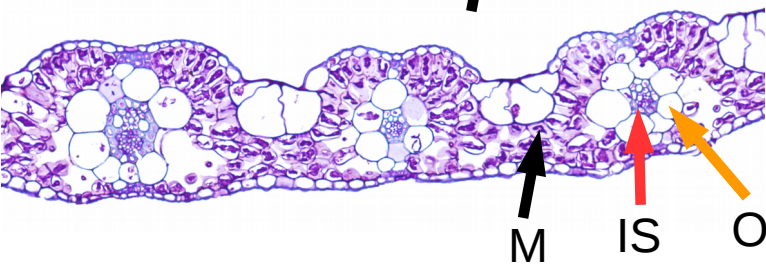

*P. pygmaeum*, C<sub>3</sub>

M IS OS

Fig. S2 A

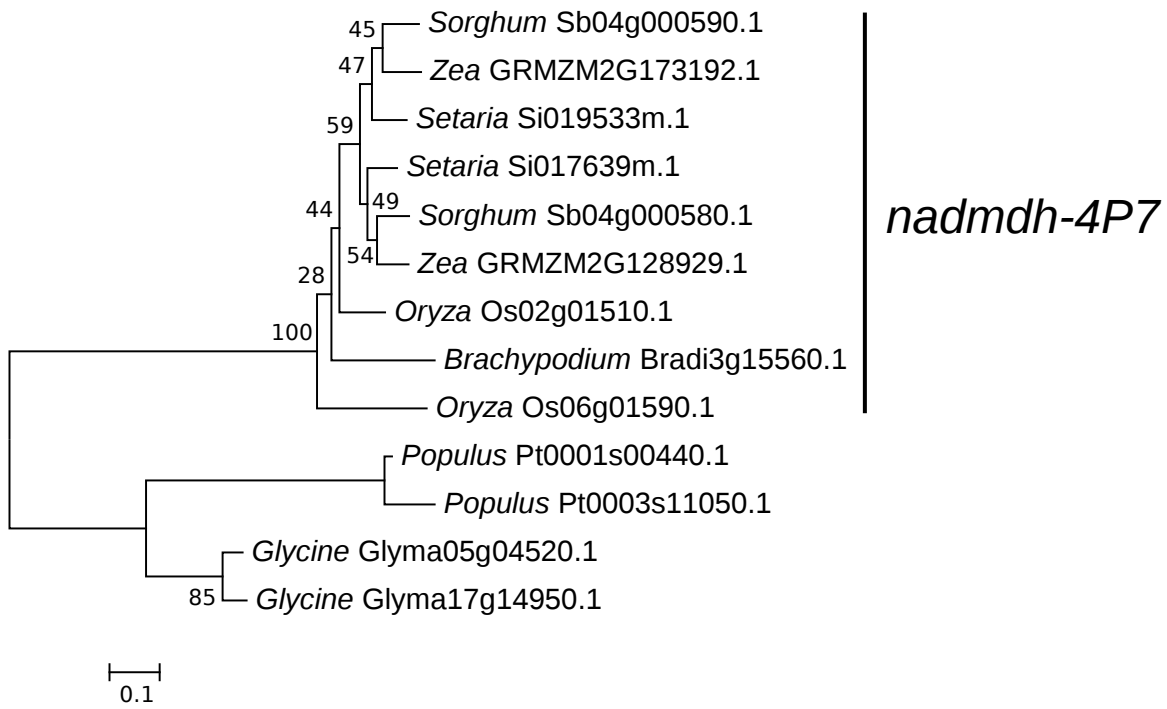

Fig. S2 B

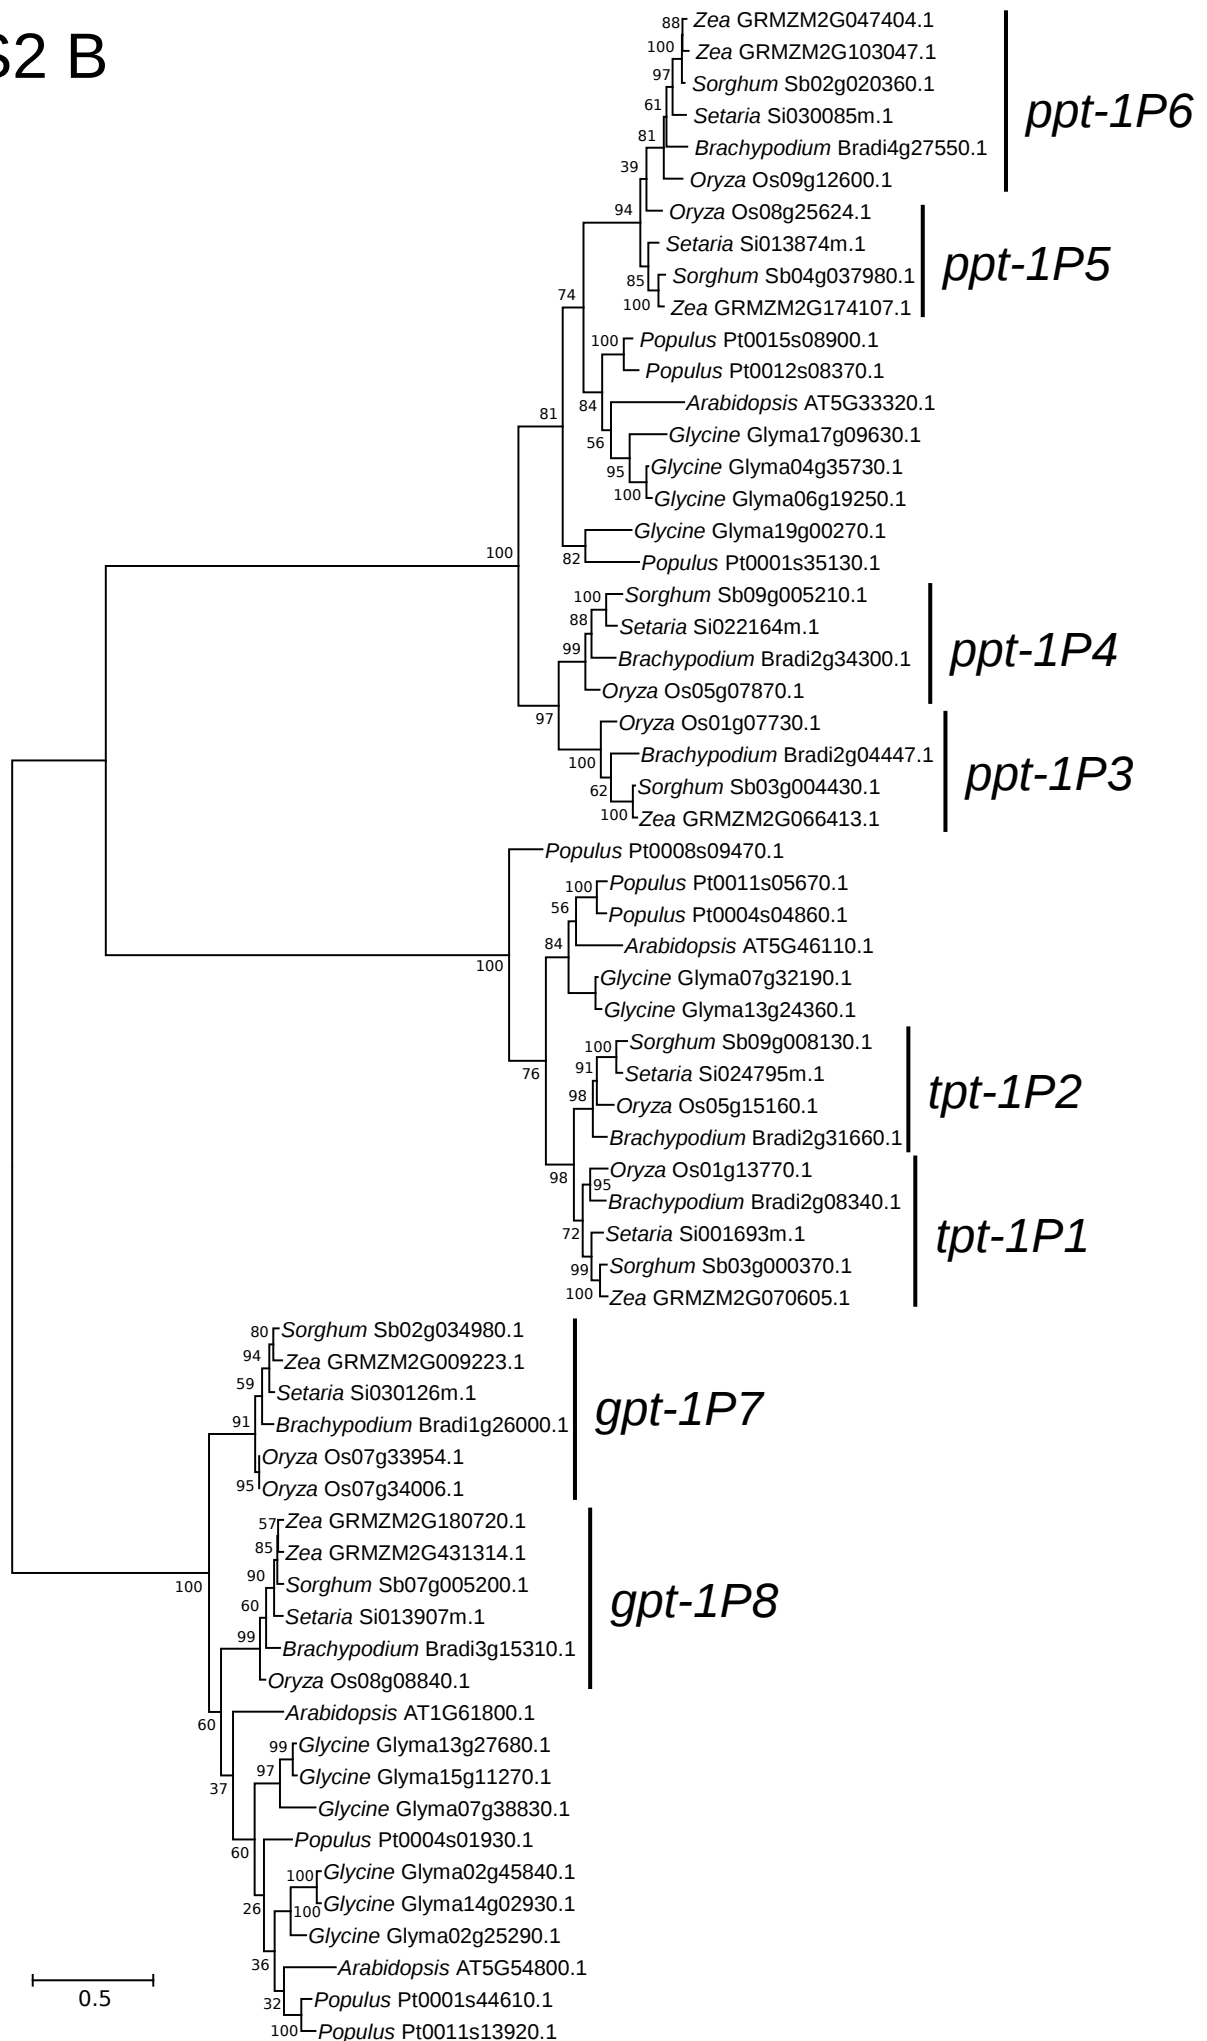

Fig. S2 C

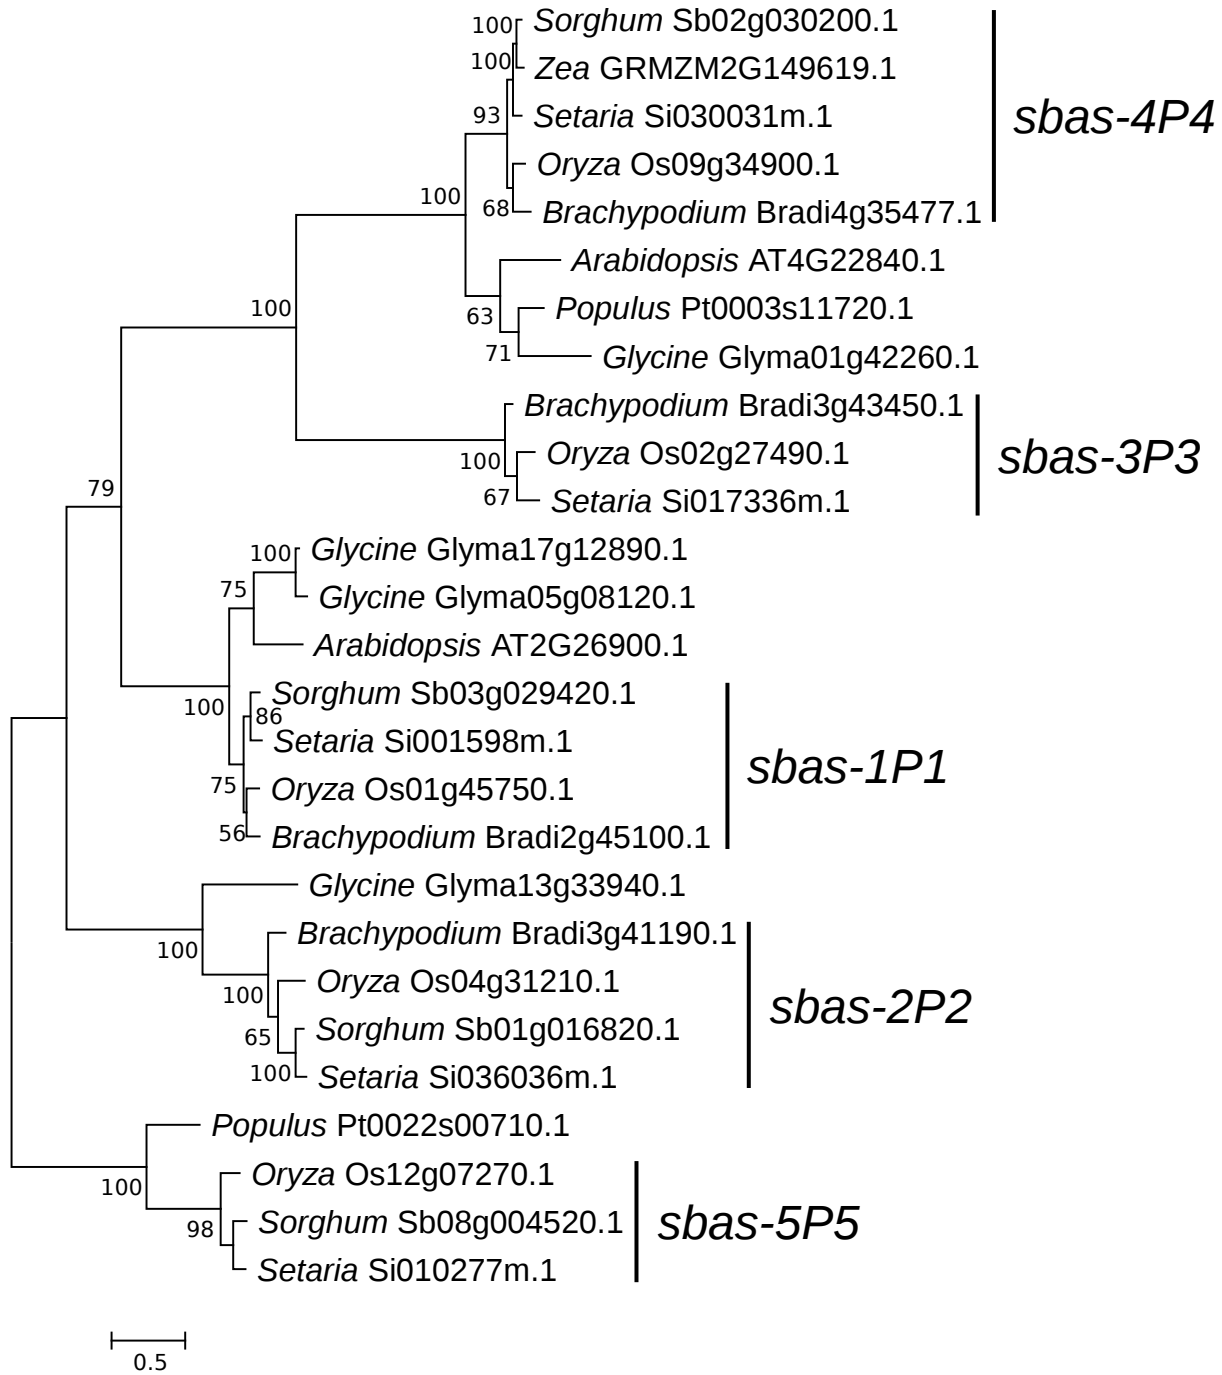

Fig. S3

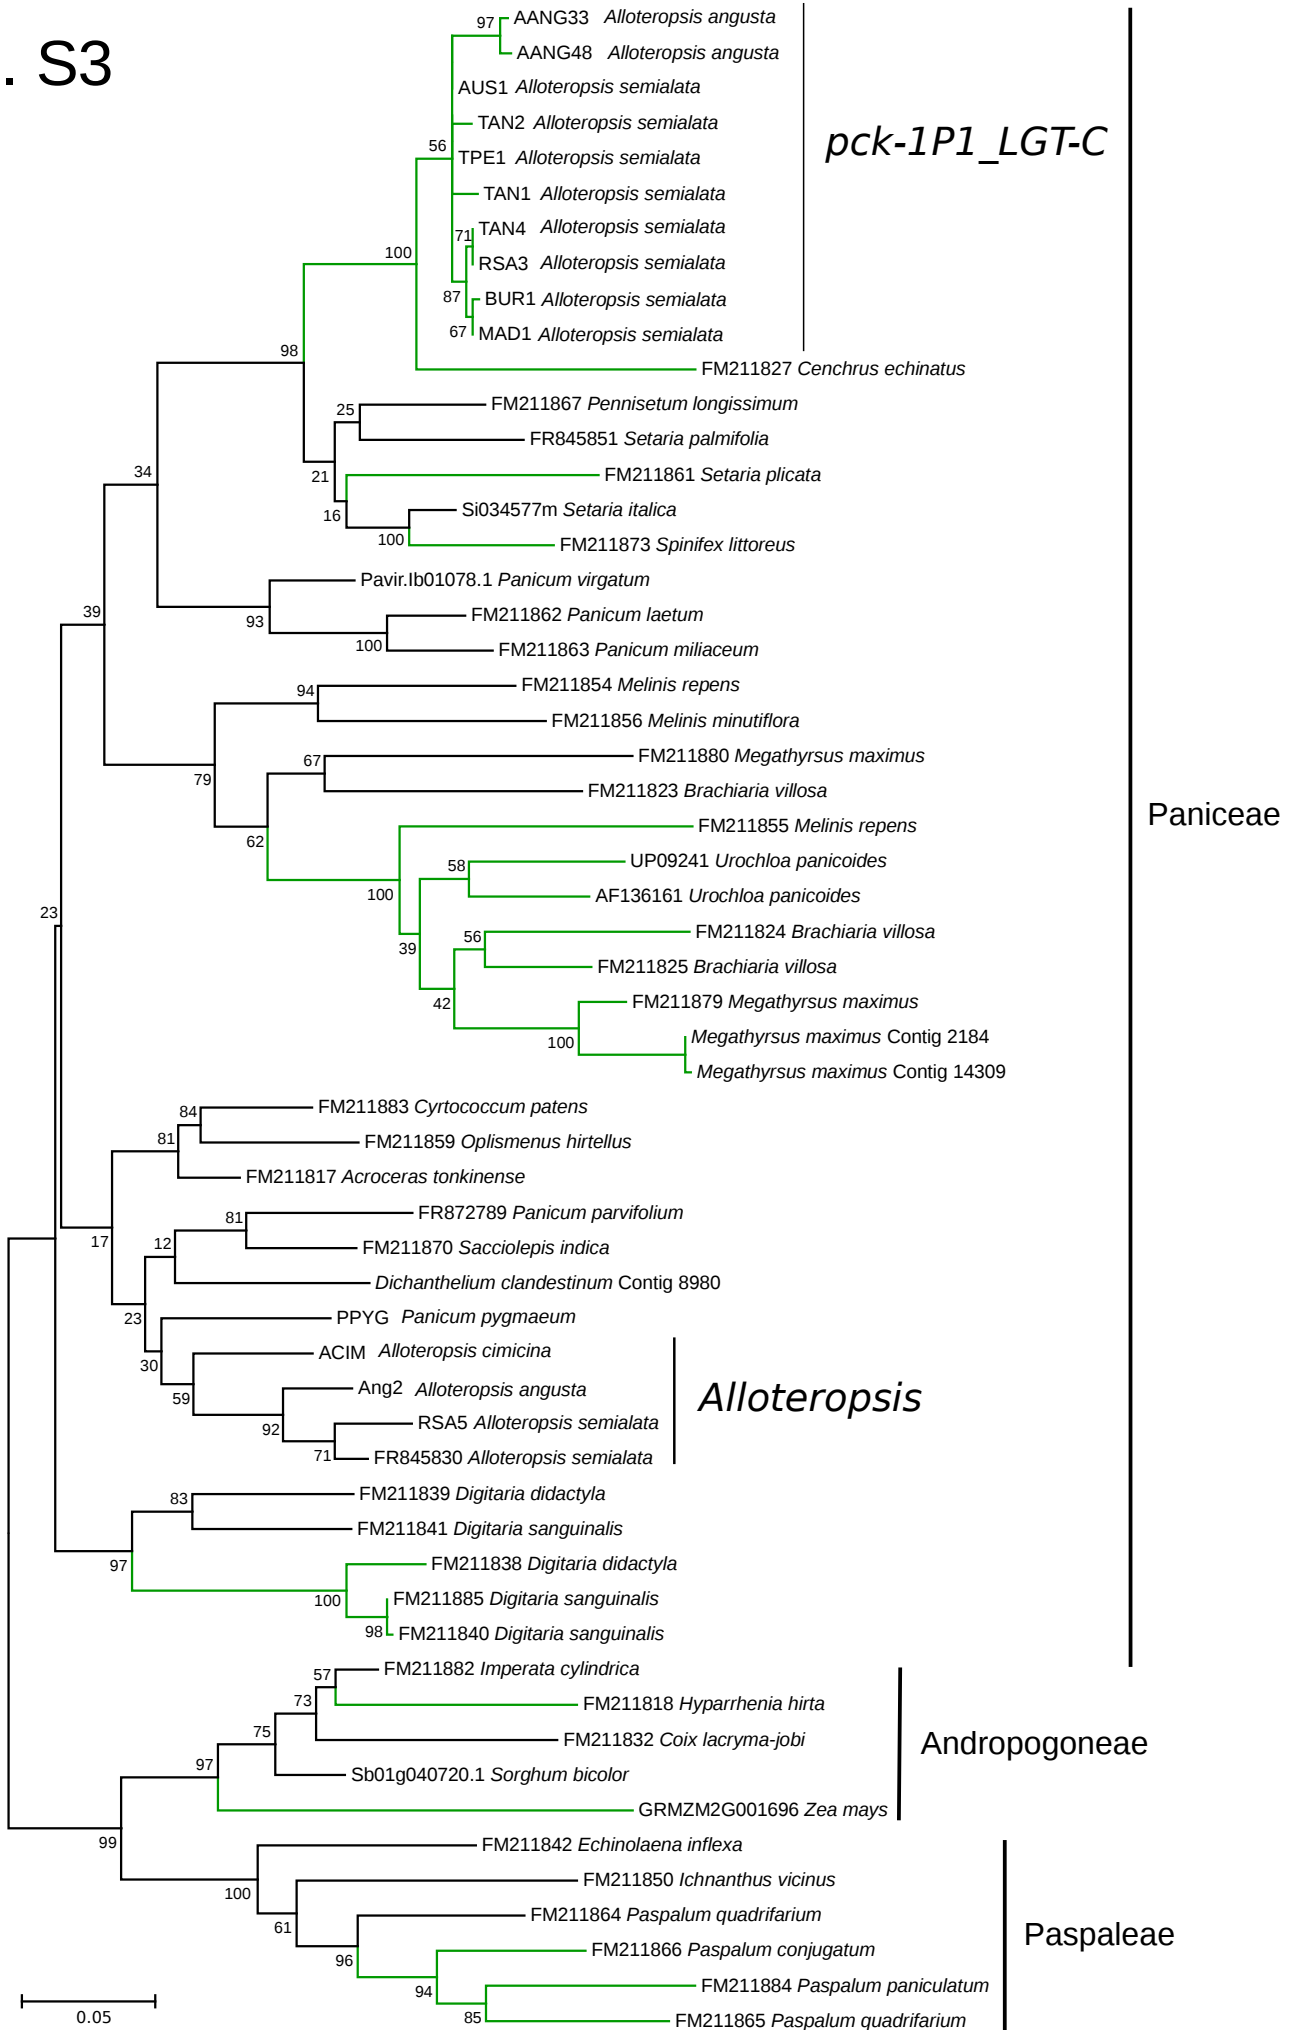

Fig. S4

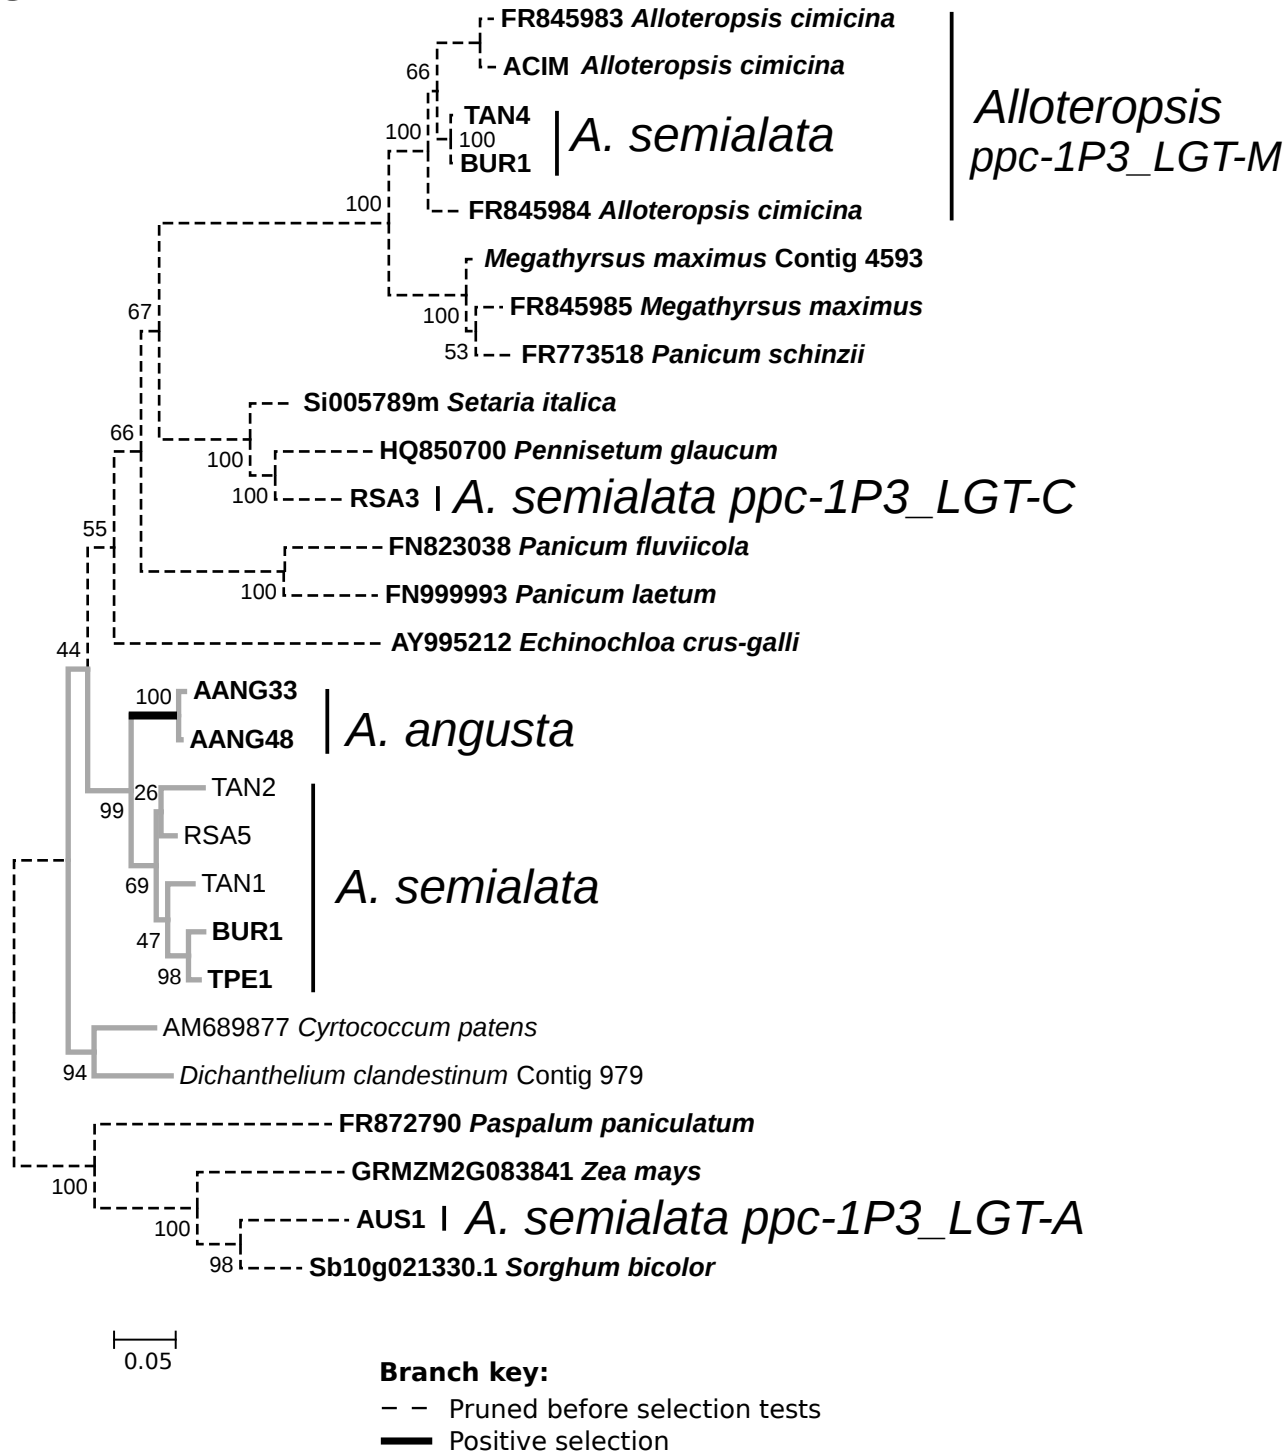

Fig. S5

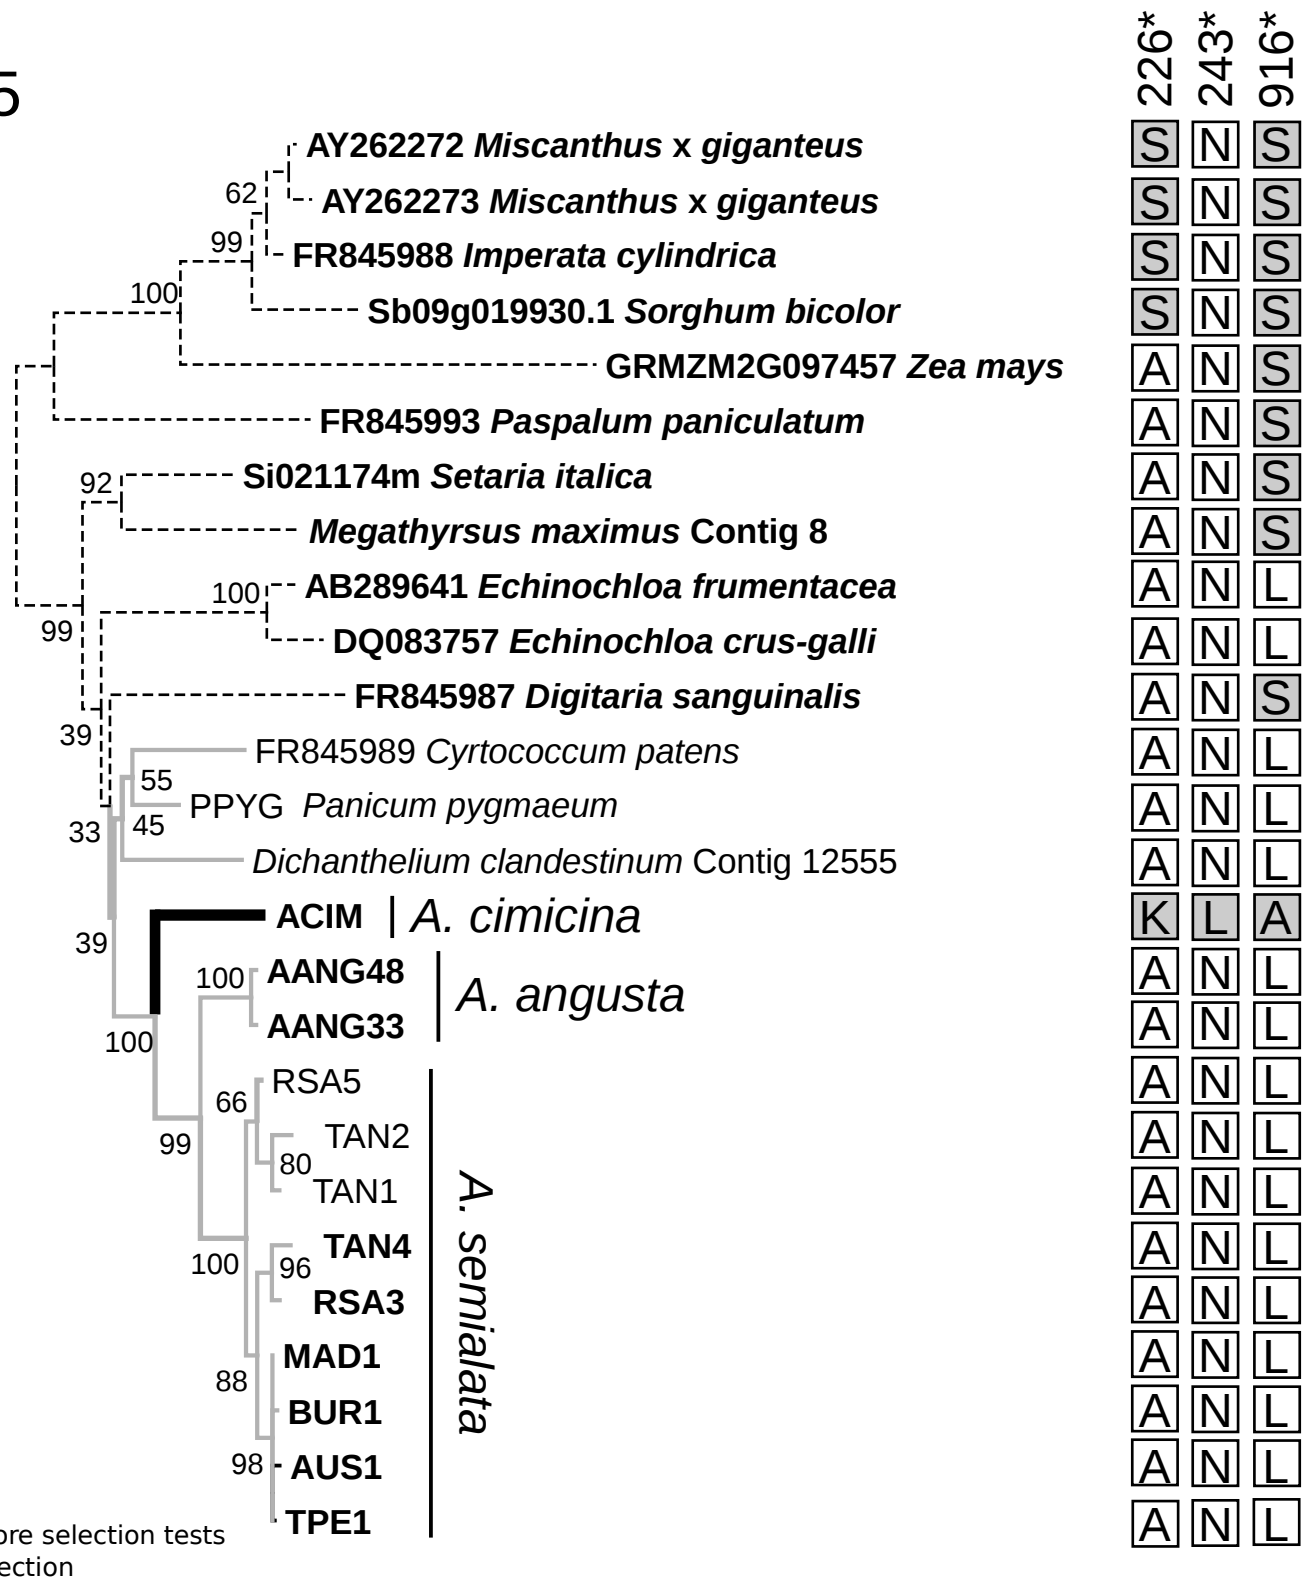

Fig. S6

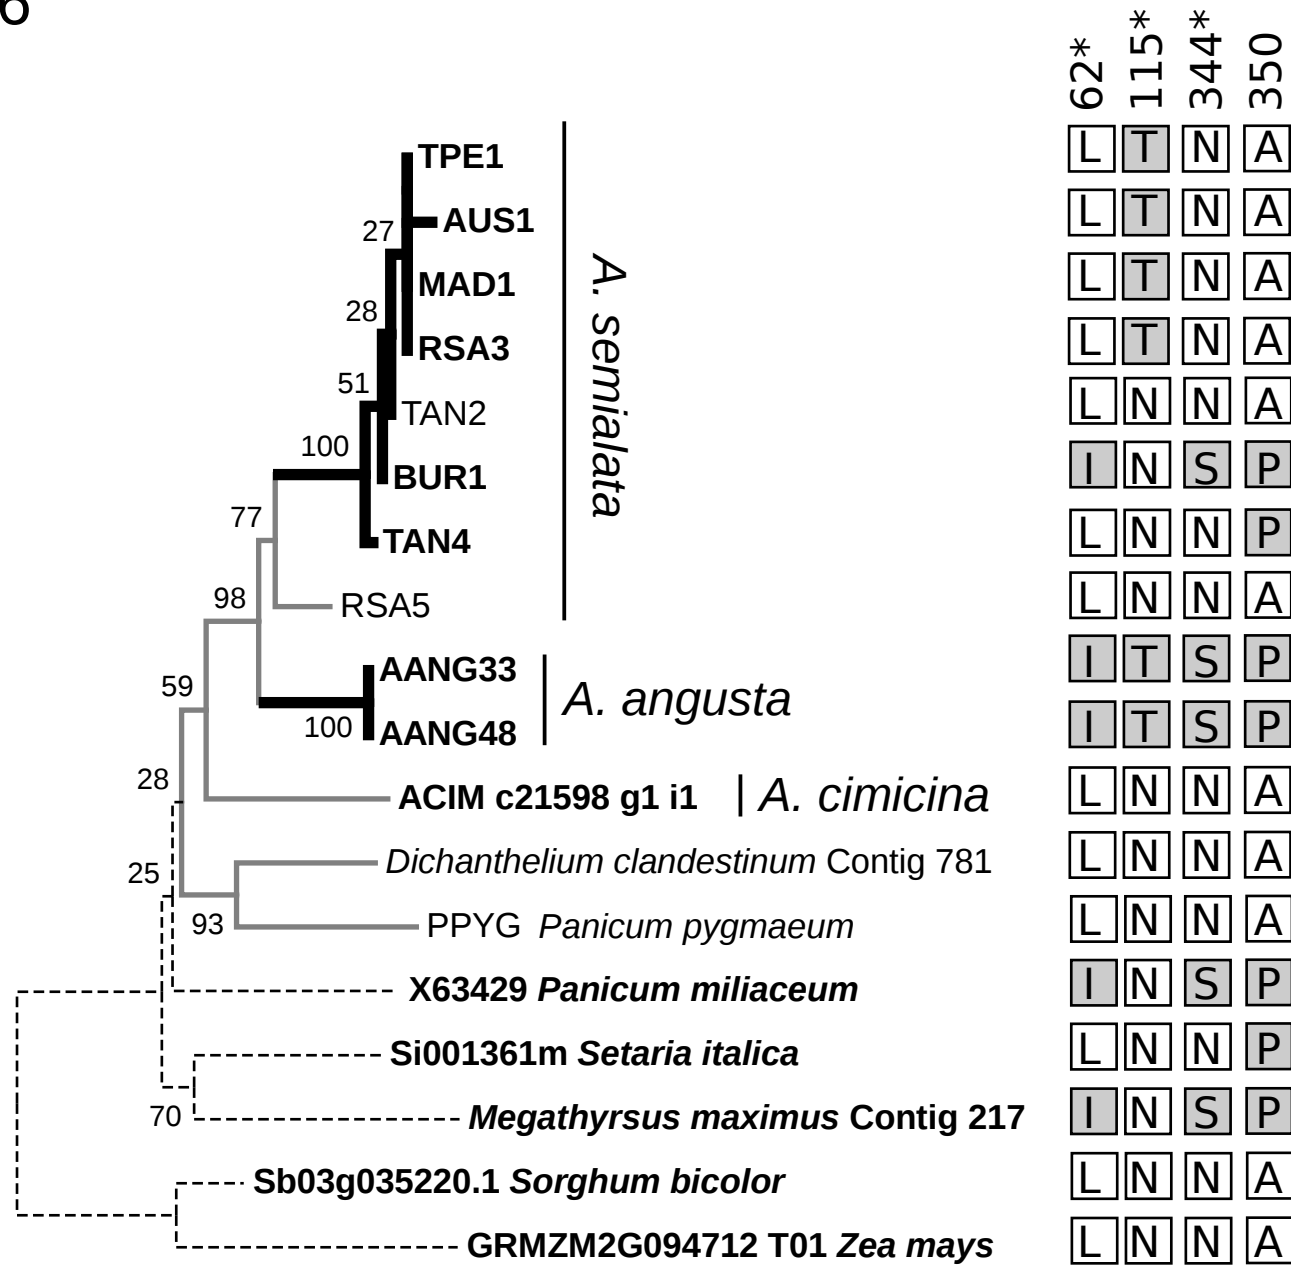

0.02
